# Supplementary material for: Deep eutectic–water binary solvent associations investigated by vibrational spectroscopy and chemometrics
Source: Royal Society of Chemistry journal article supplement (doi:10.1039/c8cp00409a), 2018-01-01
Supplement: c8cp00409a1.pdf [file c8cp00409a1.pdf]

## **Supporting Information**

### **Deep Eutectic-Water Binary Solvent Associations Investigated by Vibrational Spectroscopy and Chemometrics**

**Table S1** Name of data matrices that are used in this work

| <b>Data matrix names</b>                                                                                                             | <b>Abbreviation</b>  |
|--------------------------------------------------------------------------------------------------------------------------------------|----------------------|
| FTIR spectra of GDES-water                                                                                                           | <b>D<sub>1</sub></b> |
| Raman spectra of GDES-water                                                                                                          | <b>D<sub>2</sub></b> |
| FTIR spectra of Gly-water                                                                                                            | <b>D<sub>3</sub></b> |
| Raman spectra of Gly-water                                                                                                           | <b>D<sub>4</sub></b> |
| Row-wise augmented matrices contains<br>Raman and FTIR spectra of GDES-<br>water binary mixtures                                     | <b>D<sub>5</sub></b> |
| Row-wise augmented matrices contains<br>Raman and FTIR spectra of Gly-water<br>binary mixtures                                       | <b>D<sub>6</sub></b> |
| Column-wise augmented matrices of<br>GDES-water and Gly-water binary mixtures<br>contain FTIR and Raman spectrums (global<br>matrix) | <b>D<sub>7</sub></b> |

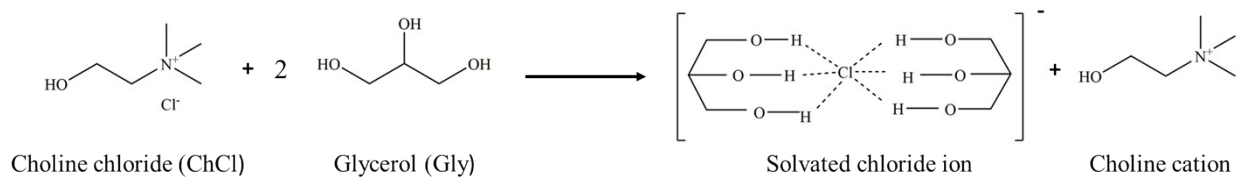

**Scheme 1.** The structures of GDES.

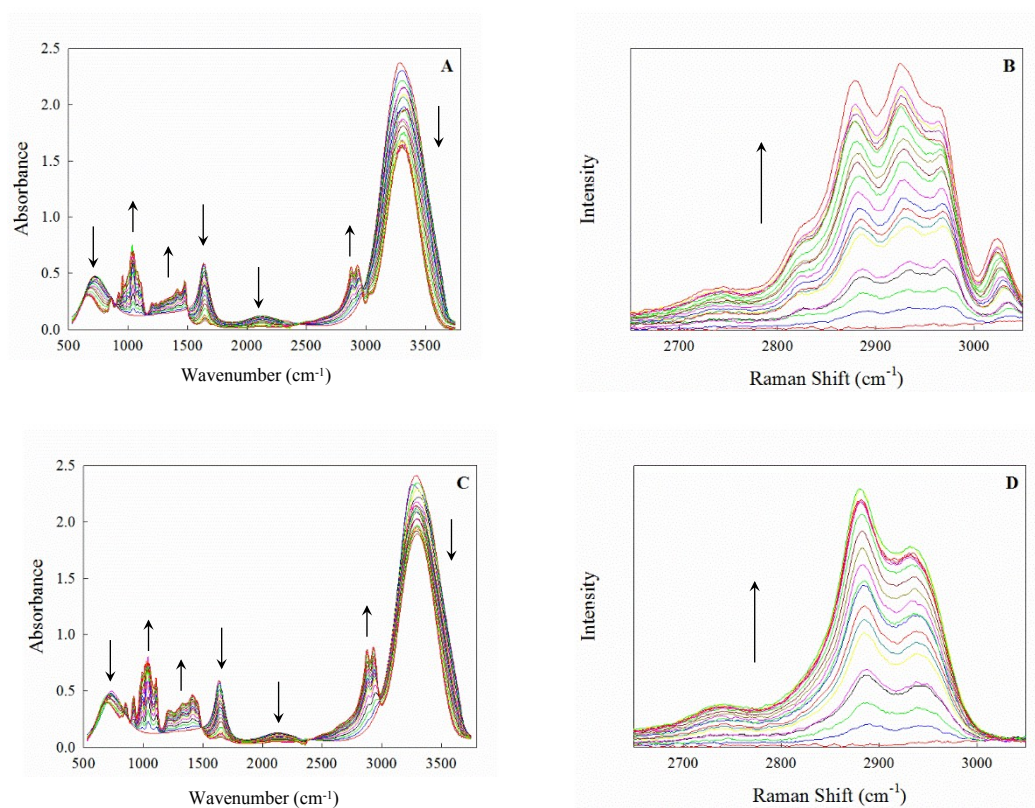

**Fig. S1** Changes in A, C) FTIR and B, D) Raman spectra of binary mixture of GDES-water (A, B) and Gly-water (C, D). The mole fractions of GDES and Gly in the binary solvent mixtures varied from 0.0 to 1.0.

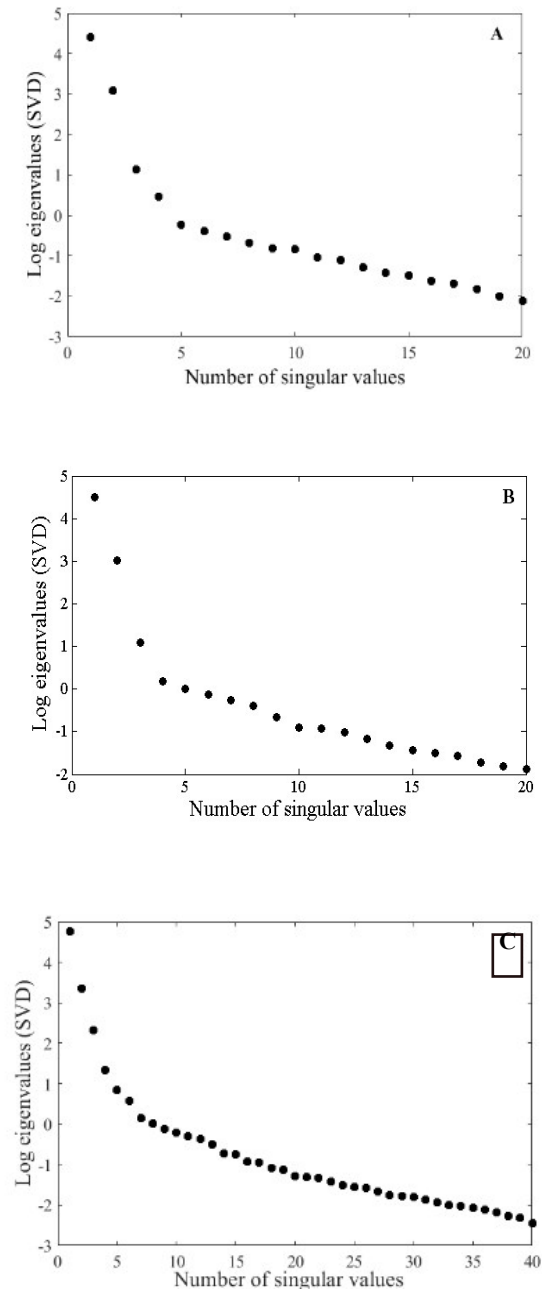

**Fig. S2** Plot of log (EV) vs. number of principle components obtained from SVD analysis of data matrice A)  $D_5$ , B)  $D_6$  and C)  $D_7$ .

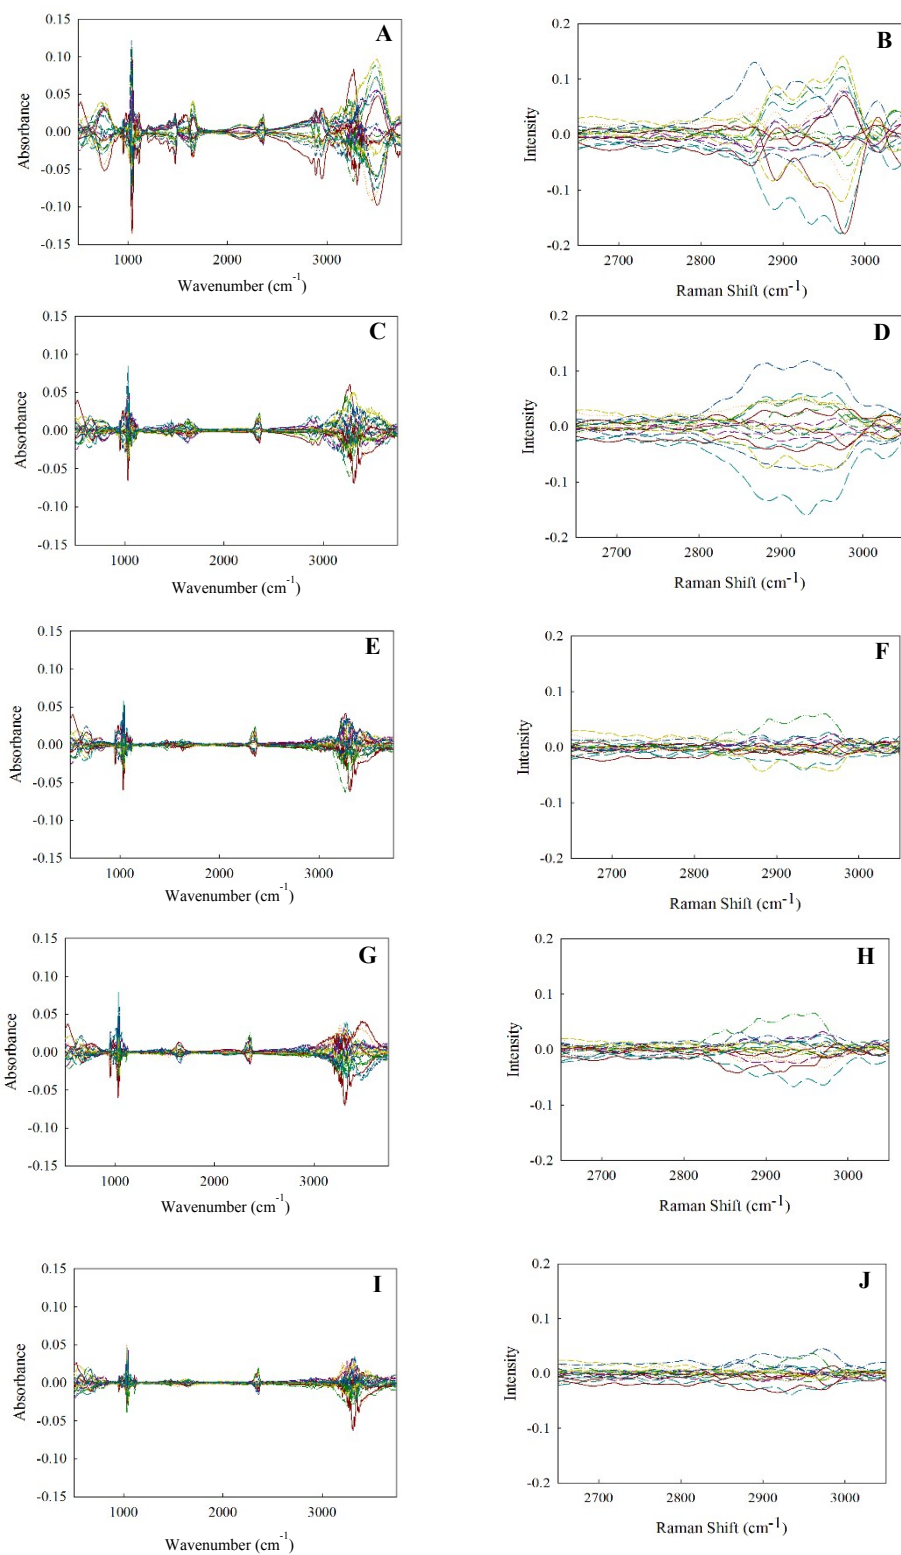

**Fig. S3** Residual IR (left column) and Raman (right column) plots for the two-component (A, B), three-component (C, D), four-component (E, F), five-component (G, H) and six-component (I, J) MCR-ALS model on the row-wise augmentation of FTIR and Raman data matrices of GDES-water binary mixture (**D<sub>5</sub>**).

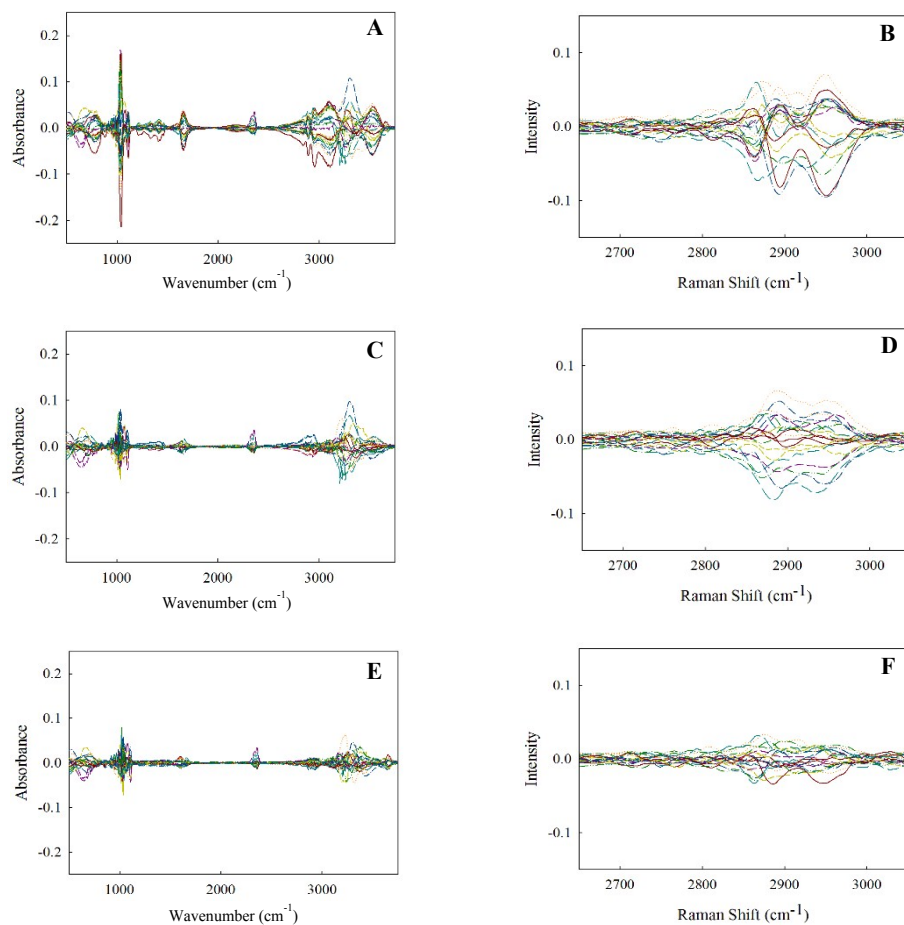

**Fig. S4** Residual IR (left column) and Raman (right column) plots for the two-component (A, B), three-component (C, D) and four-component (E, F) of MCR-ALS model on the row-wise augmentation of FTIR and Raman data matrices of Gly-water binary mixture ( $\mathbf{D}_6$ ).

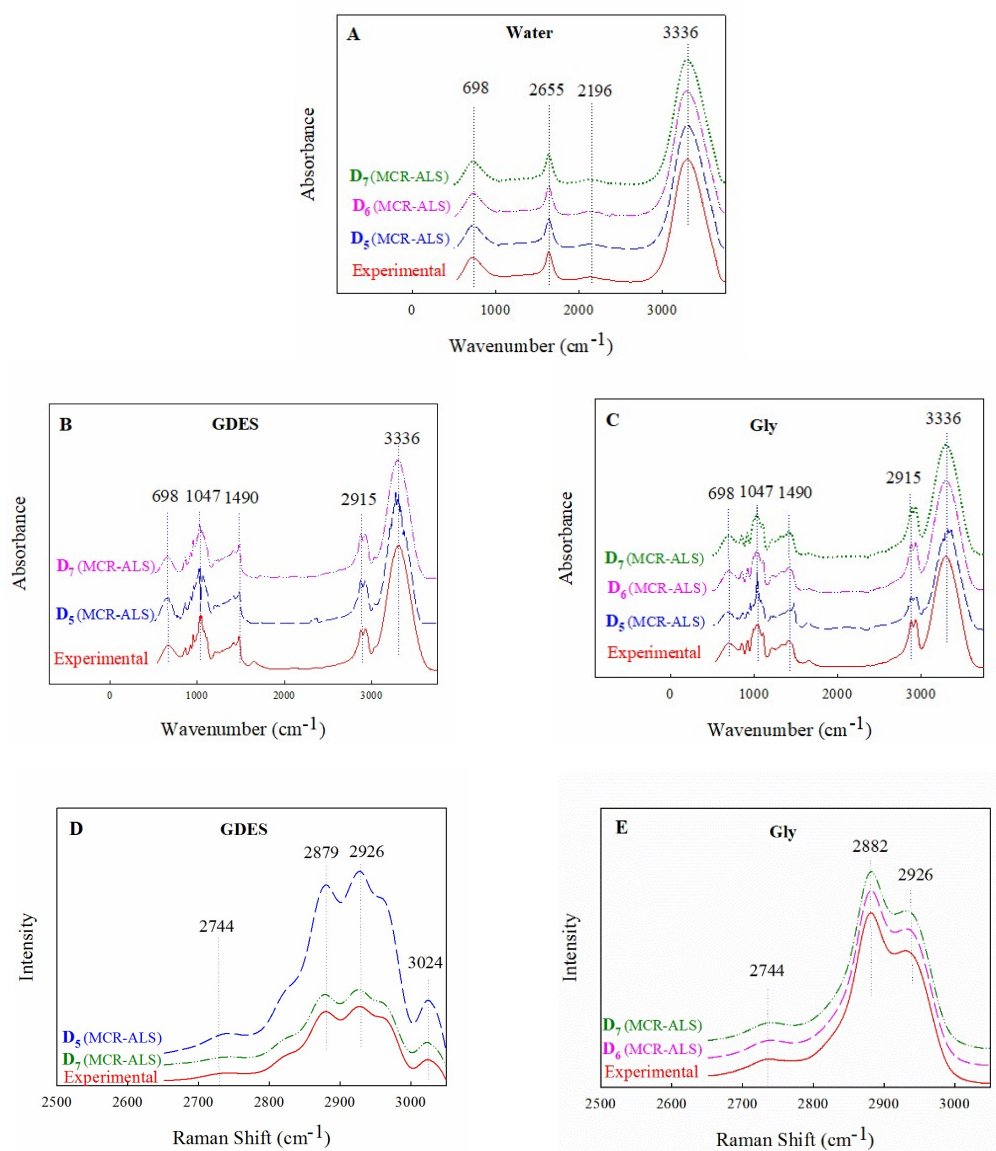

**Fig. S5** Comparative between native (experimental) and MCR-resolved FTIR spectrum of A) water, B) GDES and C) Gly and Raman spectrum of D) GDES and E) Gly.



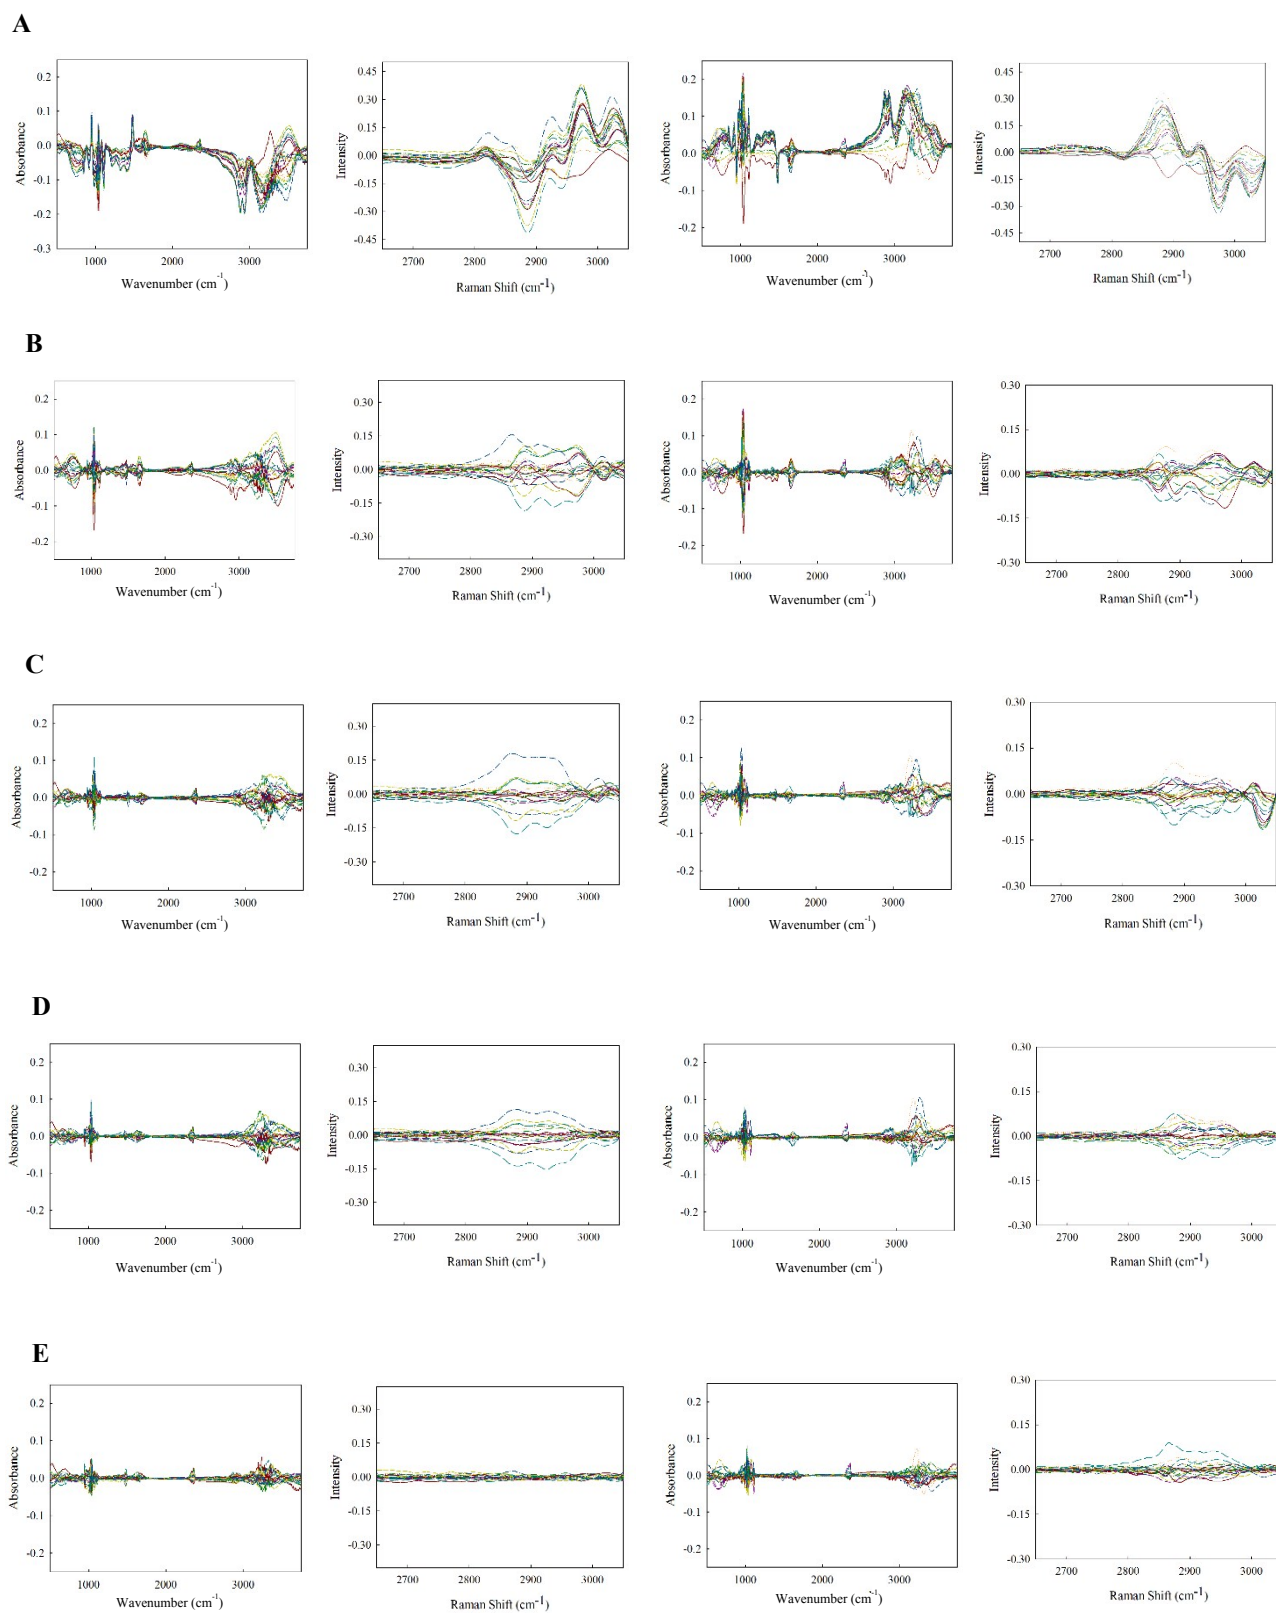

**Fig. S6** Residual plots for the two-component (A), three-component (B), four-component (C), five-component (D) and six-component (E) MCR-ALS model on the global data matrix ( $\mathbf{D}_7$ ) contain: FTIR and Raman data matrices of GDES, FTIR and Raman data matrices of Gly in columns 1-4, respectively.
